# Supplementary material for: Divergent Cross-Adaptation of Herbicide-Treated Wheat and Triticale Affected by Drought or Waterlogging
Source: MDPI journal article supplement (doi:10.3390/ijms241512503), 2023-08-06
Supplement: s1 [file s1]

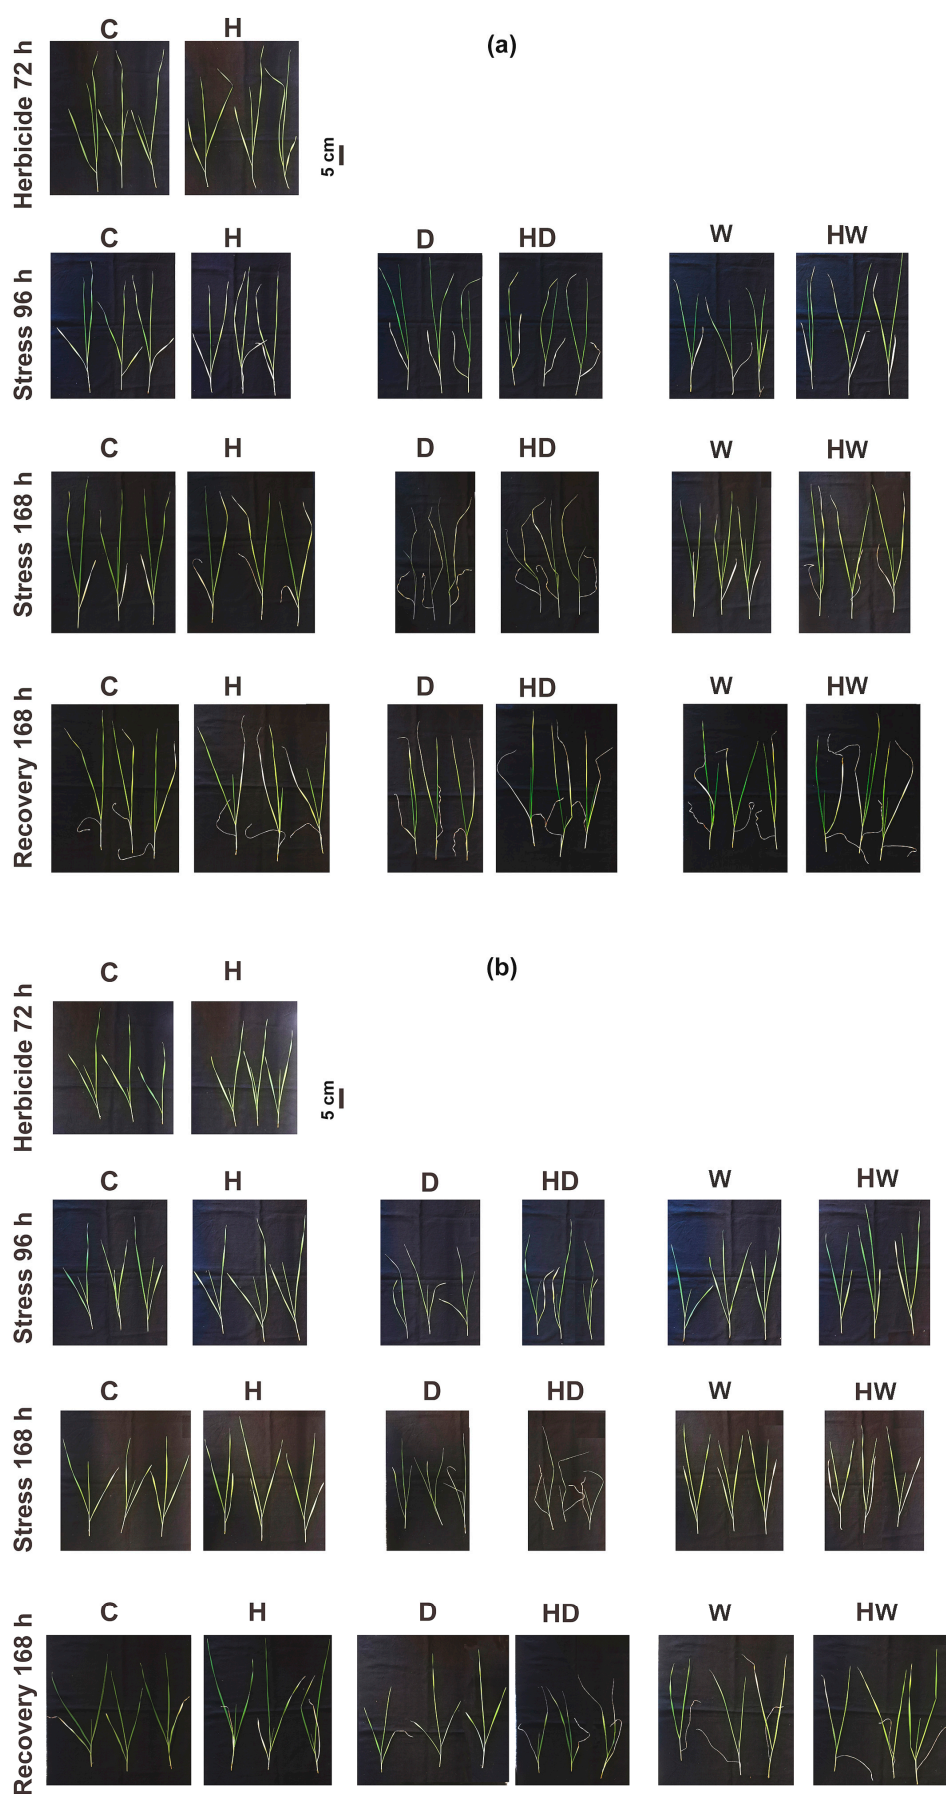

**Figure S1.** Phenotype of wheat (a) and triticale (b) control plants (C) and plants subjected to standard dose of selective herbicide Serrate® (H), drought (D) or waterlogging (W) and their combination (HD and HW respectively).

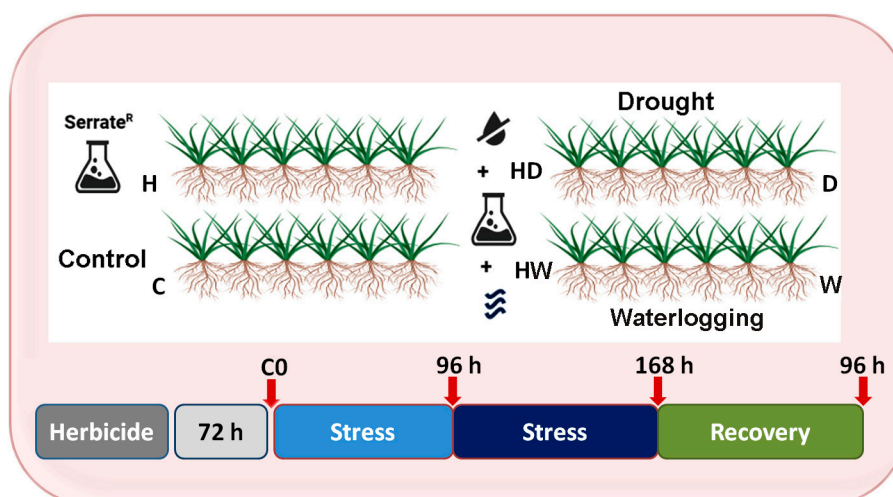

**Figure S2.** Experimental model. The red arrows indicate the sampling points included in the study. (C- controls; H-herbicide treated, a single standard dose has been applied at the beginning of the experiment; D-drought; W- waterlogged; HD – herbicide treated and subjected to drought; HW – herbicide treated and subjected to waterlogging).

**Table S1. Tukey HSD (Honestly Significant Difference) analyses of wheat biometric measurements**, at 96 h of stress, 168 h of stress and after 96 h recovery period. C – controls; H- herbicide treated; D – drought; HD – herbicide treated and subjected to drought; W – waterlogging; HW – herbicide treated and subjected to waterlogging. (“insig.” – insignificant difference, red box; green boxes represent statistically significant differences): **(A) Fresh weight; (B) Dry weight; (C) Shoot length.**

**(A) Fresh weight – wheat**

| Treatment pair | 96 h Stress |         |           | 168 h Stress |         |           | 96 h Recovery |         |           |
|----------------|-------------|---------|-----------|--------------|---------|-----------|---------------|---------|-----------|
|                | Tukey HSD   |         |           | Tukey HSD    |         |           | Tukey HSD     |         |           |
|                | Q statistic | p-value | inference | Q statistic  | p-value | inference | Q statistic   | p-value | inference |
| C vs H         | 1.422       | 0.9     | insig.    | 0.716        | 0.9     | insig.    | 2.132         | 0.641   | insig.    |
| C vs D         | 7.314       | 0.001   | ** p<0.01 | 15.23        | 0.001   | ** p<0.01 | 15.14         | 0.001   | ** p<0.01 |
| C vs HD        | 7.366       | 0.001   | ** p<0.01 | 15.38        | 0.001   | ** p<0.01 | 14.39         | 0.001   | ** p<0.01 |
| C vs W         | 0.761       | 0.9     | insig.    | 7.767        | 0.001   | ** p<0.01 | 12.02         | 0.001   | ** p<0.01 |
| C vs HW        | 0.028       | 0.9     | insig.    | 8.48         | 0.001   | ** p<0.01 | 15.42         | 0.001   | ** p<0.01 |
| H vs D         | 8.304       | 0.001   | ** p<0.01 | 15.92        | 0.001   | ** p<0.01 | 13.21         | 0.001   | ** p<0.01 |
| H vs HD        | 8.367       | 0.001   | ** p<0.01 | 16.09        | 0.001   | ** p<0.01 | 12.31         | 0.001   | ** p<0.01 |
| H vs W         | 0.704       | 0.9     | insig.    | 8.483        | 0.001   | ** p<0.01 | 9.888         | 0.001   | ** p<0.01 |
| H vs HW        | 1.395       | 0.9     | insig.    | 9.196        | 0.001   | ** p<0.01 | 13.29         | 0.001   | ** p<0.01 |
| D vs HD        | 0.144       | 0.9     | insig.    | 0.261        | 0.9     | insig.    | 1.693         | 0.816   | insig.    |
| D vs W         | 8.056       | 0.001   | ** p<0.01 | 7.667        | 0.001   | ** p<0.01 | 4.236         | 0.046   | * p<0.05  |
| D vs HW        | 7.342       | 0.001   | ** p<0.01 | 6.974        | 0.001   | ** p<0.01 | 1.152         | 0.9     | insig.    |
| HD vs W        | 8.128       | 0.001   | ** p<0.01 | 7.609        | 0.001   | ** p<0.01 | 2.686         | 0.416   | insig.    |
| HD vs HW       | 7.395       | 0.001   | ** p<0.01 | 6.897        | 0.001   | ** p<0.01 | 0.622         | 0.9     | insig.    |
| W vs HW        | 0.733       | 0.9     | insig.    | 0.712        | 0.9     | insig.    | 3.399         | 0.175   | insig.    |

**(B) Dry weight – wheat**

| Treatment pair | 96 h Stress |         |           | 168 h Stress |         |           | 96 h Recovery |         |           |
|----------------|-------------|---------|-----------|--------------|---------|-----------|---------------|---------|-----------|
|                | Tukey HSD   |         |           | Tukey HSD    |         |           | Tukey HSD     |         |           |
|                | Q statistic | p-value | inference | Q statistic  | p-value | inference | Q statistic   | p-value | inference |
| C vs H         | 0.128       | 0.9     | insig.    | 2.995        | 0.322   | insig.    | 5.786         | 0.009   | ** p<0.01 |
| C vs D         | 2.172       | 0.631   | insig.    | 3.158        | 0.271   | insig.    | 7.931         | 0.001   | ** p<0.01 |
| C vs HD        | 1.342       | 0.9     | insig.    | 3.594        | 0.164   | insig.    | 6.423         | 0.004   | ** p<0.01 |
| C vs W         | 3.77        | 0.132   | insig.    | 2.178        | 0.629   | insig.    | 1.365         | 0.9     | insig.    |
| C vs HW        | 4.281       | 0.067   | insig.    | 2.451        | 0.526   | insig.    | 3.185         | 0.268   | insig.    |
| H vs D         | 2.3         | 0.583   | insig.    | 6.154        | 0.004   | ** p<0.01 | 13.72         | 0.001   | ** p<0.01 |
| H vs HD        | 1.47        | 0.897   | insig.    | 6.589        | 0.002   | ** p<0.01 | 11.15         | 0.001   | ** p<0.01 |
| H vs W         | 3.642       | 0.155   | insig.    | 0.817        | 0.9     | insig.    | 7.151         | 0.001   | ** p<0.01 |
| H vs HW        | 4.153       | 0.08    | insig.    | 0.545        | 0.9     | insig.    | 8.971         | 0.001   | ** p<0.01 |
| D vs HD        | 0.831       | 0.9     | insig.    | 0.436        | 0.9     | insig.    | 0.053         | 0.9     | insig.    |
| D vs W         | 5.942       | 0.006   | ** p<0.01 | 5.337        | 0.015   | * p<0.05  | 6.566         | 0.003   | ** p<0.01 |
| D vs HW        | 6.453       | 0.003   | ** p<0.01 | 5.609        | 0.01    | ** p<0.01 | 4.746         | 0.039   | * p<0.05  |
| HD vs W        | 5.112       | 0.021   | * p<0.05  | 5.772        | 0.008   | ** p<0.01 | 5.308         | 0.018   | * p<0.05  |
| HD vs HW       | 5.623       | 0.01    | ** p<0.01 | 6.045        | 0.005   | ** p<0.01 | 3.822         | 0.129   | insig.    |
| W vs HW        | 0.511       | 0.9     | insig.    | 0.272        | 0.9     | insig.    | 1.82          | 0.765   | insig.    |

## (C) Shoot length – wheat

| Treatments pair | 96 h Stress |         |           | 168 h Stress |         |           | 96 h Recovery |         |           |
|-----------------|-------------|---------|-----------|--------------|---------|-----------|---------------|---------|-----------|
|                 | Tukey HSD   |         |           | Tukey HSD    |         |           | Tukey HSD     |         |           |
|                 | Q statistic | p-value | inference | Q statistic  | p-value | inference | Q statistic   | p-value | inference |
| C vs H          | 0.407       | 0.9     | insig.    | 0.373        | 0.9     | insig.    | 0.149         | 0.9     | insig.    |
| C vs D          | 4.878       | 0.011   | * p<0.05  | 5.895        | 0.001   | ** p<0.01 | 5.216         | 0.005   | ** p<0.01 |
| C vs HD         | 4.159       | 0.047   | * p<0.05  | 5.602        | 0.002   | ** p<0.01 | 4.785         | 0.014   | * p<0.05  |
| C vs W          | 1.506       | 0.891   | insig.    | 2.604        | 0.448   | insig.    | 4.694         | 0.017   | * p<0.05  |
| C vs HW         | 2.61        | 0.445   | insig.    | 3.3          | 0.193   | insig.    | 5.525         | 0.003   | ** p<0.01 |
| H vs D          | 4.11        | 0.052   | insig.    | 5.32         | 0.004   | ** p<0.01 | 5.234         | 0.005   | ** p<0.01 |
| H vs HD         | 3.459       | 0.153   | insig.    | 5.052        | 0.008   | ** p<0.01 | 4.775         | 0.014   | * p<0.05  |
| H vs W          | 0.997       | 0.9     | insig.    | 2.136        | 0.639   | insig.    | 4.705         | 0.016   | * p<0.05  |
| H vs HW         | 2.033       | 0.68    | insig.    | 2.798        | 0.365   | insig.    | 5.568         | 0.002   | ** p<0.01 |
| D vs HD         | 0.64        | 0.9     | insig.    | 0.176        | 0.9     | insig.    | 0.081         | 0.9     | insig.    |
| D vs W          | 3.293       | 0.195   | insig.    | 3.336        | 0.183   | insig.    | 0.78          | 0.9     | insig.    |
| D vs HW         | 2.103       | 0.652   | insig.    | 2.744        | 0.387   | insig.    | 0.041         | 0.9     | insig.    |
| HD vs W         | 2.611       | 0.444   | insig.    | 3.093        | 0.255   | insig.    | 0.783         | 0.9     | insig.    |
| HD vs HW        | 1.453       | 0.9     | insig.    | 2.509        | 0.488   | insig.    | 0.122         | 0.9     | insig.    |
| W vs HW         | 1.113       | 0.9     | insig.    | 0.655        | 0.9     | insig.    | 0.793         | 0.9     | insig.    |

**Table S2. Tukey HSD (Honestly Significant Difference ) analyses of triticale biometric measurements, at 96 h of stress, 168 h of stress and after 96 h recovery period. C – controls; H- herbicide treated; D – drought; HD – herbicide treated and subjected to drought; W – waterlogging; HW – herbicide treated and subjected to waterlogging. (“insig.” – insignificant difference, red boxes; green boxes represent statistically significant differences): (A) Fresh weight; (B) Dry weight; (C) Shoot length.**

**(A) Fresh weigh - triticale**

| Treatment pair | 96 h Stress |         |           | 168 h Stress |         |           | 96 h Recovery |         |           |
|----------------|-------------|---------|-----------|--------------|---------|-----------|---------------|---------|-----------|
|                | Tukey HSD   |         |           | Tukey HSD    |         |           | Tukey HSD     |         |           |
|                | Q statistic | p-value | inference | Q statistic  | p-value | inference | Q statistic   | p-value | inference |
| C vs H         | 1.984       | 0.7     | insig.    | 0.319        | 0.9     | insig.    | 1.758         | 0.79    | insig.    |
| C vs D         | 12.03       | 0.001   | ** p<0.01 | 19.86        | 0.001   | ** p<0.01 | 17.05         | 0.001   | ** p<0.01 |
| C vs HD        | 11.24       | 0.001   | ** p<0.01 | 20.44        | 0.001   | ** p<0.01 | 17            | 0.001   | ** p<0.01 |
| C vs W         | 2.14        | 0.636   | insig.    | 0.291        | 0.9     | insig.    | 3.962         | 0.065   | insig.    |
| C vs HW        | 0.65        | 0.9     | insig.    | 0.677        | 0.9     | insig.    | 3.077         | 0.257   | insig.    |
| H vs D         | 11.6        | 0.001   | ** p<0.01 | 20.19        | 0.001   | ** p<0.01 | 18.59         | 0.001   | ** p<0.01 |
| H vs HD        | 10.69       | 0.001   | ** p<0.01 | 20.77        | 0.001   | ** p<0.01 | 18.54         | 0.001   | ** p<0.01 |
| H vs W         | 0.306       | 0.9     | insig.    | 0.018        | 0.9     | insig.    | 5.626         | 0.002   | ** p<0.01 |
| H vs HW        | 1.384       | 0.9     | insig.    | 0.962        | 0.9     | insig.    | 4.795         | 0.012   | * p<0.05  |
| D vs HD        | 0.909       | 0.9     | insig.    | 0.122        | 0.9     | insig.    | 0.046         | 0.9     | insig.    |
| D vs W         | 10.43       | 0.001   | ** p<0.01 | 19.55        | 0.001   | ** p<0.01 | 12.63         | 0.001   | ** p<0.01 |
| D vs HW        | 12.12       | 0.001   | ** p<0.01 | 17.03        | 0.001   | ** p<0.01 | 13.97         | 0.001   | ** p<0.01 |
| HD vs W        | 9.592       | 0.001   | ** p<0.01 | 20.07        | 0.001   | ** p<0.01 | 12.59         | 0.001   | ** p<0.01 |
| HD vs HW       | 11.28       | 0.001   | ** p<0.01 | 17.4         | 0.001   | ** p<0.01 | 13.93         | 0.001   | ** p<0.01 |
| W vs HW        | 1.581       | 0.862   | insig.    | 0.923        | 0.9     | insig.    | 0.967         | 0.9     | insig.    |

**(B) Dry weight - triticale**

| Treatment pair  | 96 h Stress |         |           | 168 h Stress |         |           | 96 h Recovery |         |           |
|-----------------|-------------|---------|-----------|--------------|---------|-----------|---------------|---------|-----------|
|                 | Tukey HSD   |         |           | Tukey HSD    |         |           | Tukey HSD     |         |           |
|                 | Q statistic | p-value | inference | Q statistic  | p-value | inference | Q statistic   | p-value | inference |
| <b>C vs H</b>   | 1.304       | 0.9     | insig.t   | 0.11         | 0.9     | insig.t   | 4.185         | 0.079   | insig.t   |
| <b>C vs D</b>   | 0.401       | 0.9     | insig.t   | 2.525        | 0.499   | insig.t   | 8.477         | 0.001   | ** p<0.01 |
| <b>C vs HD</b>  | 0.602       | 0.9     | insig.t   | 2.58         | 0.478   | insig.t   | 9.604         | 0.001   | ** p<0.01 |
| <b>C vs W</b>   | 3.209       | 0.256   | insig.t   | 1.067        | 0.9     | insig.t   | 0.662         | 0.9     | insig.t   |
| <b>C vs HW</b>  | 4.312       | 0.064   | insig.t   | 0.878        | 0.9     | insig.t   | 0.107         | 0.9     | insig.t   |
| <b>H vs D</b>   | 1.705       | 0.808   | insig.t   | 2.415        | 0.541   | insig.t   | 12.66         | 0.001   | ** p<0.01 |
| <b>H vs HD</b>  | 1.905       | 0.732   | insig.t   | 2.47         | 0.52    | insig.t   | 13.79         | 0.001   | ** p<0.01 |
| <b>H vs W</b>   | 1.905       | 0.732   | insig.t   | 1.169        | 0.9     | insig.t   | 4.537         | 0.049   | * p<0.05  |
| <b>H vs HW</b>  | 3.008       | 0.317   | insig.t   | 0.988        | 0.9     | insig.t   | 4.078         | 0.091   | insig.t   |
| <b>D vs HD</b>  | 0.201       | 0.9     | insig.t   | 0.055        | 0.9     | insig.t   | 1.127         | 0.9     | insig.t   |
| <b>D vs W</b>   | 3.61        | 0.161   | insig.t   | 3.404        | 0.208   | insig.t   | 7.186         | 0.001   | ** p<0.01 |
| <b>D vs HW</b>  | 4.713       | 0.037   | * p<0.05  | 3.403        | 0.209   | insig.t   | 8.584         | 0.001   | ** p<0.01 |
| <b>HD vs W</b>  | 3.811       | 0.125   | insig.t   | 3.455        | 0.196   | insig.t   | 8.229         | 0.001   | ** p<0.01 |
| <b>HD vs HW</b> | 4.914       | 0.028   | * p<0.05  | 3.458        | 0.196   | insig.t   | 9.711         | 0.001   | ** p<0.01 |
| <b>W vs HW</b>  | 1.103       | 0.9     | insig.t   | 0.254        | 0.9     | insig.t   | 0.762         | 0.9     | insig.t   |

**(C) Shoot length - triticales**

| Treatment pair  | 96 h Stress |         |           | 168 h Stress |         |           | 96 h Recovery |         |              |
|-----------------|-------------|---------|-----------|--------------|---------|-----------|---------------|---------|--------------|
|                 | Tukey HSD   |         |           | Tukey HSD    |         |           | Tukey HSD     |         |              |
|                 | Q statistic | p-value | inference | Q statistic  | p-value | inference | Q statistic   | p-value | inference    |
| <b>C vs H</b>   | 1.042       | 0.9     | insig.t   | 0.978        | 0.9     | insig.t   | 0.083         | 0.9     | insig.t      |
| <b>C vs D</b>   | 2.796       | 0.363   | insig.t   | 3.288        | 0.194   | insig.t   | 4.045         | 0.056   | insig.t      |
| <b>C vs HD</b>  | 3.461       | 0.149   | insig.t   | 3.73         | 0.098   | insig.t   | 5.071         | 0.007   | **<br>p<0.01 |
| <b>C vs W</b>   | 0.183       | 0.9     | insig.t   | 1.107        | 0.9     | insig.t   | 1.952         | 0.712   | insig.t      |
| <b>C vs HW</b>  | 1.213       | 0.9     | insig.t   | 1.189        | 0.9     | insig.t   | 1.082         | 0.9     | insig.t      |
| <b>H vs D</b>   | 3.949       | 0.066   | insig.t   | 2.182        | 0.62    | insig.t   | 4.013         | 0.059   | insig.t      |
| <b>H vs HD</b>  | 4.649       | 0.017   | * p<0.05  | 2.538        | 0.475   | insig.t   | 5.051         | 0.007   | **<br>p<0.01 |
| <b>H vs W</b>   | 0.898       | 0.9     | insig.t   | 0.028        | 0.9     | insig.t   | 1.896         | 0.735   | insig.t      |
| <b>H vs HW</b>  | 0.164       | 0.9     | insig.t   | 0.142        | 0.9     | insig.t   | 1.014         | 0.9     | insig.t      |
| <b>D vs HD</b>  | 0.65        | 0.9     | insig.t   | 0.248        | 0.9     | insig.t   | 1.204         | 0.9     | insig.t      |
| <b>D vs W</b>   | 3.102       | 0.249   | insig.t   | 2.385        | 0.538   | insig.t   | 1.888         | 0.738   | insig.t      |
| <b>D vs HW</b>  | 4.163       | 0.045   | * p<0.05  | 2.179        | 0.621   | insig.t   | 2.893         | 0.324   | insig.t      |
| <b>HD vs W</b>  | 3.801       | 0.086   | insig.t   | 2.813        | 0.356   | insig.t   | 2.959         | 0.3     | insig.t      |
| <b>HD vs HW</b> | 4.876       | 0.01    | * p<0.05  | 2.571        | 0.461   | insig.t   | 3.953         | 0.066   | insig.t      |
| <b>W vs HW</b>  | 1.075       | 0.9     | insig.t   | 0.128        | 0.9     | insig.t   | 0.892         | 0.9     | insig.t      |
